# Supplementary material
Source: Springer Nature journal article supplement (https://www.springermedizin.de/resource/supplementary/12885_2008_1457_MOESM1_ESM.pdf/9472054)

**U ref**

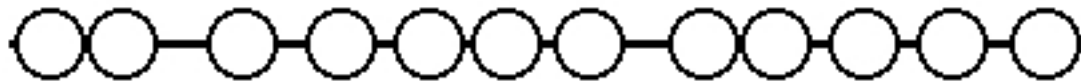

**M ref**

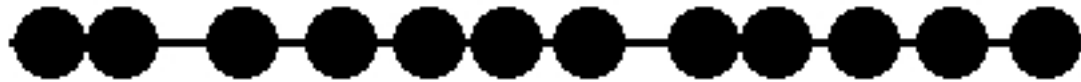

**No Loss**

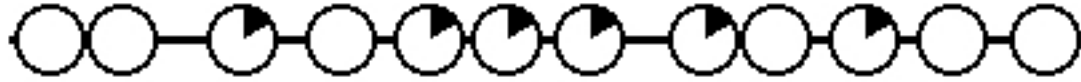

**Clonal Loss**

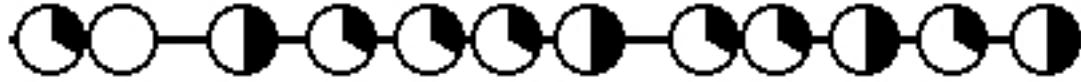

**Complete Loss**

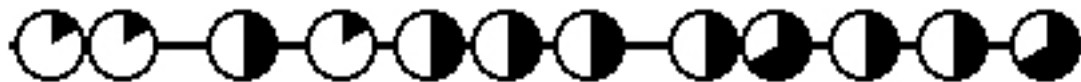

Supplement: MOESM1 [file 9472054]
